# Supplementary material for: Identification of Sieve Element Occlusion Gene (SEOs) Family in Rubber Trees (Hevea brasiliensis Muell. Arg.) Provides Insights to the Mechanism of Laticifer Plugging
Source: MDPI journal article supplement (doi:10.3390/f13030433), 2022-03-09
Supplement: s1 [file s1]

**File S1. Motif analysis of SEO proteins from other plants.** At (*A.thaliana*), Pt(*P.trichocarpa*) , Rc( *Ricinus communis* ), Me( *Manihot esculenta*).

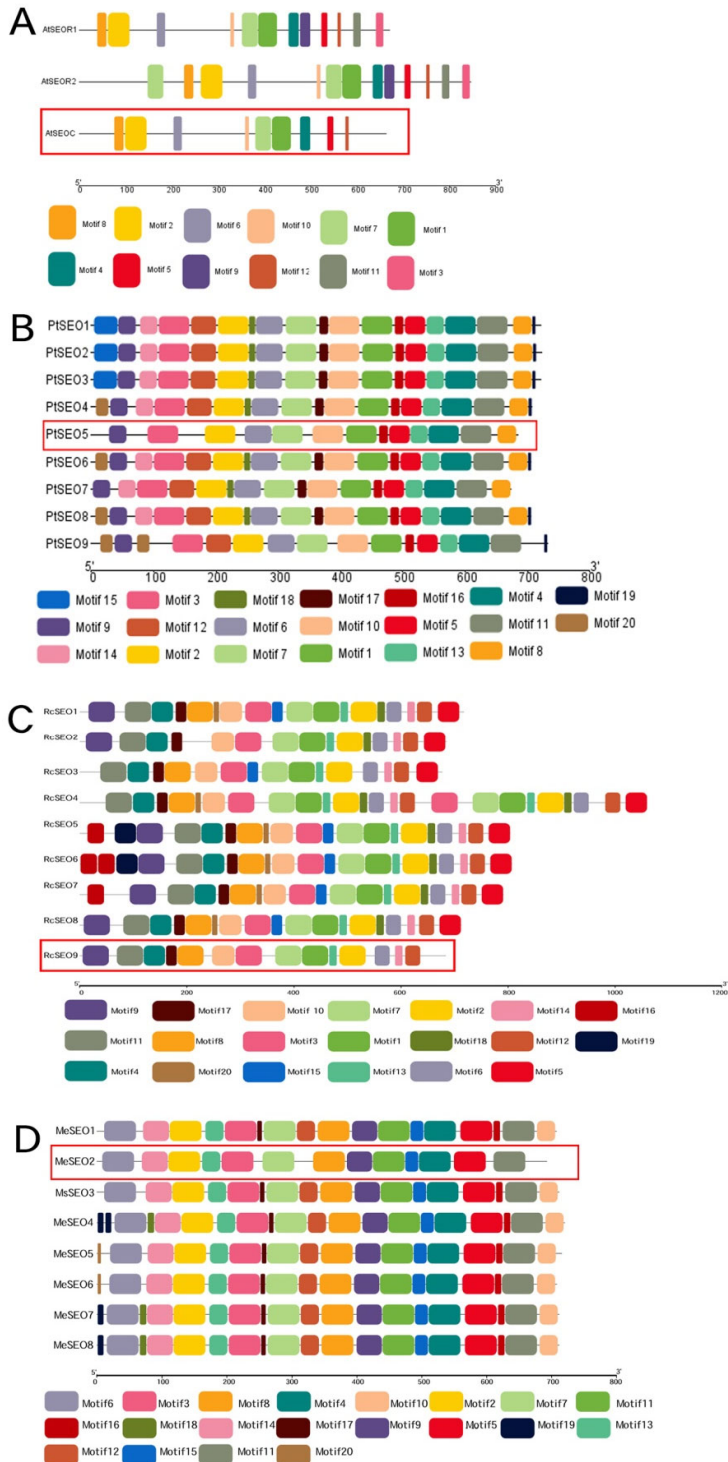

**Table S1.**The SEO Protein ID (NCBI) of *Populus trichocarpa*, *cassava*, *Arabidopsis*, *Ricinus communis*.

| Species                     | SEO Protein ID (NCBI)                                                                                                                                    |
|-----------------------------|----------------------------------------------------------------------------------------------------------------------------------------------------------|
| <i>Ricinus communis</i>     | _002526959.1 , XP_002526960.1 , XP_015579500.1 , XP_002526964.1 , XP_015579534.1 , XP_002526966.3 , XP_015572118.1 , XP_025012374.1 , EEF35448.1         |
| <i>Cassava</i>              | nes.12G020100Ma, Manes.12G020200Ma , Manes.13G020500Ma , Manes.15G153300Ma , Manes.15G153400Ma , Manes.17G109500Ma , Manes.17G109600Ma,Manes.17G109700Ma |
| <i>Arabidopsis thaliana</i> | _186817.1, NP_001325831.1, NP_001319338.1                                                                                                                |
| <i>Populus trichocarpa</i>  | _024448303.1 , XP_002298571.3 , XP_006369948.1 , XP_006379953.2 , XP_024466106.1 , XP_006378256.2 , XP_024466439.1 , XP_006378256.2 , XP_006376885.1     |
